# Supplementary material
Source: publisher site journal article supplement (https://www.degruyter.com/publication/journal_key/BIOL/downloadAsset/BIOL_EACR%20Cancer%20Multiomics%20and%20Computational%20Biology%202024.pdf)
Supplement: Supplementary file 1 [file BIOL_EACR%20Cancer%20Multiomics%20and%20Computational%20Biology%202024.pdf]

EACR Conference

# CANCER MULTIOMICS & COMPUTATIONAL BIOLOGY

30 April - 02 May 2024, Bergamo

## **Short description:**

This revamped iteration of our renowned Cancer Genomics series will cover the latest exciting developments in the fields of genomics and bioinformatics including machine learning and AI, single-cell and spatial analysis of cancers, cell plasticity, cancer immunity genomics, data integration and convergence, epigenetics, and genomic instability.

Featuring an exceptional international faculty, extensive networking opportunities and a limited number of in-person participants, this conference will provide both the possibility and intimate setting for top quality scientific interaction. The target audience for this conference is: participants from across a number of fields including systems biology, bioinformatics, artificial intelligence and machine learning, cancer medicine, translational research, epigenomics, cancer immunology and molecular pathology. Importantly, early career researchers will have the opportunity to present their work to the international community.

### **Speakers:**

Ido Amit (Weizmann Institute of Science, Israel), James Brenton (Cancer Research UK Cambridge Institute, UK), Carlos Caldas (Cancer Research UK Cambridge Institute, UK), Hannah Carter (UC San Diego, USA), Sarah-Maria Fendt (VIB-KU Leuven Centre for Cancer Biology, Belgium), Nuria Lopez-Bigas (Institute for Research for Biomedicine, Spain), Asaf Madi (Tel Aviv University, Israel), Elaine Mardis (Institute for Genomic Medicine, USA), Francisco Martinez-Jimenez (Centre for Molecular Medicine, Netherlands), Elisa Oricchio (EPFL, Switzerland), Dana Pe'er (Memorial Sloan Kettering Cancer Center, USA), Trevor Pugh (Princess Margaret Cancer Centre, Canada), Eytan Ruppin (Center for Cancer Research, National Cancer Institute, USA), Yardena Samuels (Weizmann Institute of Science, Israel), and Efrat Shema (Weizmann Institute of Science, Israel)

**[Conference website: click here](#)**

Contact Person: Chris Iliffe <[christopher.iliffe@eacr.org](mailto:christopher.iliffe@eacr.org)>

**REGISTRATION  
DEADLINE:**

**25/03/2024**

# EACR

European Association  
for Cancer Research

**PROMOTIONAL PARTNER:**

DE  
|  
G**DE GRUYTER**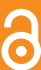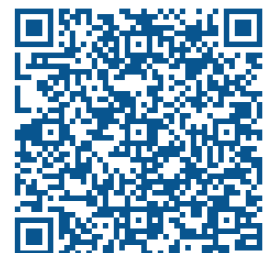

**REGISTER HERE**

EACR Conference

# CANCER MULTIOMICS & COMPUTATIONAL BIOLOGY

30 April - 02 May 2024, Bergamo

As a promotional partner of this meeting, De Gruyter's Open Access journal, Open Life Sciences, offers all participants a 30% discount for Article Processing Charges, for all manuscripts submitted before August 31st, 2024.

## How to submit

Authors are kindly invited to submit their contribution via online submission system Editorial Manager available at:  
<https://www.editorialmanager.com/openbiol/default1.aspx>

Please remember to select: SI: CANCER MULTIOMICS to ensure that your manuscript is processed with the highest priority and that discount is applied.

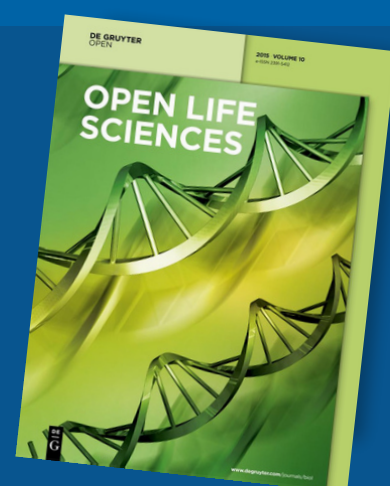

SUBMISSION  
DEADLINE:

31/08/2024

PROMOTIONAL PARTNER

EACR

European Association  
for Cancer ResearchDE  
G

DE GRUYTER

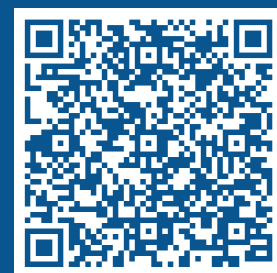

REGISTER HERE
